# Supplementary material for: ABCC2 rs2273697, rs717620, rs3740066 Polymorphisms and Antiseizure Medication Resistance: A Systematic Review and Meta-Analysis
Source: Research Square preprint supplement (doi:10.21203/rs.3.rs-8270204/v1), 2026-02-04
Supplement: Supplementary file 1 [file 3c6085dc00bfc0906e1538df.docx]

**Supplementary Table 1.** GRADE assessment of certainty of evidence for ABCC2 polymorphisms

| **Genetic Models** | **Risk of Bias** | **Inconsistency** | **Indirectness** | **Imprecision** | **Publication Bias** | **Overall Certainty** |
| --- | --- | --- | --- | --- | --- | --- |
| rs717620 (all genetic models) | Not serious | Not serious to moderate | Not serious | Serious | Not serious | Moderate |
| rs2273697 (all genetic models) | Not serious | Serious | Not serious | Serious | Not serious | Low |
| rs3740066 (all genetic models) | Not serious | Not serious | Not serious | Very serious | Not serious | Very low |
